# Supplementary material
Source: PubMed Central journal article supplement (PMC6520617)
Supplement: TableS1.pdf [file TableS1.pdf]

### Mann-Whitney Test

| Measurement                                             | n-value dorsal/ventral/animals | Median (dorsal/ventral) | p-value | U Statistic | Significant? | K-S normality test        |                         |              | F-test  |                 |
|---------------------------------------------------------|--------------------------------|-------------------------|---------|-------------|--------------|---------------------------|-------------------------|--------------|---------|-----------------|
|                                                         |                                |                         |         |             |              | K-S dist.: dorsal/ventral | p-value: dorsal/ventral | norm. dist.? | p-value | equal variance? |
| V <sub>m</sub> (mV)                                     | 38/29/43                       | 1.032258065             | 0.045   | 393.5       | Yes          | 0.154/0.117               | 0.024/>0.10             | No           |         |                 |
| Sag rest (max R <sub>N</sub> /steady R <sub>N</sub> )   | 8/10/10                        | 1.02/1.05               | 0.094   | 21          | No           | 0.132/0.296               | >0.10/0.013             | No           |         |                 |
| Sag -65 mV (max R <sub>N</sub> /steady R <sub>N</sub> ) | 8/13/10                        | 1.01/1.07               | 0.065   | 26.5        | No           | 0.323/0.173               | 0.014/>0.10             | No           |         |                 |
| Change in V <sub>m</sub> (Barium) (mV)                  | 16/10/19                       | 7.5/5.5                 | 0.325   | 61          | No           | 0.16/0.159                | >0.10/>0.10             | Yes          | 0.014   | No              |

### Unpaired t-test two-tailed

| Measurement                                          | n-value dorsal/ventral/animals | Mean ± SEM (dorsal/ventral)    | p-value | t-ratio | df | Significant? | K-S normality test        |                         |             | F-test  |                 |
|------------------------------------------------------|--------------------------------|--------------------------------|---------|---------|----|--------------|---------------------------|-------------------------|-------------|---------|-----------------|
|                                                      |                                |                                |         |         |    |              | K-S dist.: dorsal/ventral | p-value: dorsal/ventral | Norm dist.? | p-value | equal variance? |
| R <sub>N</sub> rest (MΩ)                             | 8/10/10                        | 99.00 ± 10.94/140.6 ± 11.33    | 0.02    | 2.6     | 16 | Yes          | 0.219/0.223               | >0.10/>0.10             | Yes         | 0.714   | Yes             |
| R <sub>N</sub> -65 mV (MΩ)                           | 8/13/10                        | 92.01 ± 7.41/129.9 ± 8.40      | 0.006   | 3.09    | 19 | Yes          | 0.199/0.177               | >0.10/>0.10             | Yes         | 0.336   | Yes             |
| Rebound @ rest (mV/mV)                               | 8/10/10                        | -0.035 ± 0.021/-0.020 ± 0.015  | 0.58    | 0.57    | 16 | No           | 0.172/0.219               | >0.10/>0.10             | Yes         | 0.588   | Yes             |
| Rebound -65 mV (mV/mV)                               | 8/13/10                        | -0.058 ± 0.014/-0.095 ± 0.019  | 0.18    | 1.39    | 19 | No           | 0.2/0.16                  | >0.10/>0.10             | Yes         | 0.152   | Yes             |
| Somato-dendritic length (μm)                         | 7/7/10                         | 462.1 ± 34.13/484.7 ± 13.80    | 0.53    | 0.65    | 11 | No           | 0.201/0.229               | >0.10/>0.10             | Yes         | 0.62    | Yes             |
| Surface area (mm <sup>2</sup> )                      | 7/7/10                         | 17.20 ± 1.357/13.52 ± 1.12     | 0.058   | 2.1     | 12 | No           | 0.183/0.273               | >0.10/>0.10             | Yes         | 0.65    | Yes             |
| V <sub>thresh</sub> -65 mV (mV)                      | 15/9/23                        | -49.41 ± 0.7427/-45.11 ± 1.489 | 0.009   | 2.88    | 22 | Yes          | 0.178/0.117               | >0.10/>0.10             | Yes         | 0.143   | Yes             |
| G <sub>K-Total</sub> density (pS / μm <sup>2</sup> ) | 6/7/09                         | 281.6 ± 59.27/216.8 ± 45.76    | 0.4     | 0.88    | 11 | No           | 0.234/0.235               | >0.10/>0.10             | Yes         | 0.665   | Yes             |
| G <sub>K-SLOW</sub> density (pS / μm <sup>2</sup> )  | 6/7/09                         | 94.17 ± 16.61/155.6 ± 21.00    | 0.047   | 2.24    | 11 | Yes          | 0.262/0.233               | >0.10/>0.10             | Yes         | 0.506   | Yes             |
| G <sub>K-Fast</sub> density (pS / μm <sup>2</sup> )  | 6/7/09                         | 181.3 ± 26.45/110.5 ± 19.30    | 0.056   | 2.16    | 10 | No           | 0.272/0.148               | >0.10/>0.10             | Yes         | 0.511   | Yes             |
| G <sub>K-SUST</sub> density (pS / μm <sup>2</sup> )  | 5/5/09                         | 16.88 ± 4.093/15.26 ± 5.083    | 0.81    | 0.25    | 8  | No           | 0.198/0.341               | >0.10/>0.10             | Yes         | 0.685   | Yes             |
| % I <sub>K-SLOW</sub>                                | 6/7/09                         | 36.71 ± 3.712/50.94 ± 3.902    | 0.024   | 2.61    | 11 | Yes          | 0.148/0.177               | >0.10/>0.10             | Yes         | 0.798   | Yes             |
| G <sub>K-Fast</sub> Activation V <sub>1/2</sub> (mV) | 6/6/09                         | 6.100 ± 4.745/6.550 ± 4.795    | 0.95    | 0.07    | 10 | No           | 0.184/0.198               | >0.10/>0.10             | Yes         | 0.982   | Yes             |
| G <sub>K-Slow</sub> Activation V <sub>1/2</sub> (mV) | 6/6/09                         | -22.12 ± 4.73/-21.12 ± 3.33    | 0.86    | 0.173   | 10 | No           | 0.222/0.161               | >0.10/>0.10             | Yes         | 0.46    | Yes             |
| Change in R <sub>N</sub> (Barium) (MΩ)               | 16/10/19                       | 27.71 ± 10.44/54.18 ± 11.92    | 0.116   | 1.63    | 24 | No           | 0.205/0.177               | 0.072/>0.10             | Yes         | 0.778   | Yes             |

### Two-way ANOVA

**Sholl Analysis** Ventral: 7/Dorsal: 7/ Animals: 10

| Source of Variation            | % of total variation | P value  | P value summary | Significant?        | Sidak's multiple comparisons test | Mean Diff. | 95% CI of diff. | Significant?    |    |
|--------------------------------|----------------------|----------|-----------------|---------------------|-----------------------------------|------------|-----------------|-----------------|----|
| Interaction                    | 4.992                | 0.0114   | *               | Yes                 | dorsal - ventral                  |            |                 |                 |    |
| Scaled Distance from soma (μm) | 57.02                | < 0.0001 | ****            | Yes                 | Row 1                             | 0          | -4.985 to 4.985 | No              |    |
| Dorsal-Ventral                 | 1.019                | 0.0006   | ***             | Yes                 | Row 2                             | 1          | -3.985 to 5.985 | No              |    |
|                                |                      |          |                 |                     | Row 3                             | 1.57       | -3.414 to 6.557 | No              |    |
| ANOVA table                    | SS                   | DF       | MS              | F (DFn, DFd)        | P value                           | Row 4      | 2               | -2.985 to 6.985 | No |
| Interaction                    | 492.3                | 35       | 14.07           | F (35, 432) = 1.667 | P = 0.0114                        | Row 5      | 3.71            | -1.271 to 8.700 | No |
| Scaled Distance from soma (μm) | 5623                 | 35       | 160.7           | F (35, 432) = 19.04 | P < 0.0001                        | Row 6      | 3.43            | -1.557 to 8.414 | No |

|                |       |     |       |                    |            |        |       |                  |     |
|----------------|-------|-----|-------|--------------------|------------|--------|-------|------------------|-----|
| Dorsal-Ventral | 100.4 | 1   | 100.4 | F (1, 432) = 11.90 | P = 0.0006 | Row 7  | 3.14  | -1.842 to 8.128  | No  |
| Residual       | 3646  | 432 | 8.439 |                    |            | Row 8  | 0.57  | -4.414 to 5.557  | No  |
|                |       |     |       |                    |            | Row 9  | -0.29 | -5.271 to 4.700  | No  |
|                |       |     |       |                    |            | Row 10 | -2.14 | -7.128 to 2.842  | No  |
|                |       |     |       |                    |            | Row 11 | 0     | -4.985 to 4.985  | No  |
|                |       |     |       |                    |            | Row 12 | 0.14  | -4.842 to 5.128  | No  |
|                |       |     |       |                    |            | Row 13 | 2.14  | -2.842 to 7.128  | No  |
|                |       |     |       |                    |            | Row 14 | 1.71  | -3.271 to 6.700  | No  |
|                |       |     |       |                    |            | Row 15 | 5.71  | 0.7290 to 10.70  | Yes |
|                |       |     |       |                    |            | Row 16 | 4.43  | -0.5567 to 9.414 | No  |
|                |       |     |       |                    |            | Row 17 | 2.57  | -2.414 to 7.557  | No  |
|                |       |     |       |                    |            | Row 18 | 3.86  | -1.128 to 8.842  | No  |
|                |       |     |       |                    |            | Row 19 | 2.43  | -2.557 to 7.414  | No  |
|                |       |     |       |                    |            | Row 20 | 2.86  | -2.128 to 7.842  | No  |
|                |       |     |       |                    |            | Row 21 | 1.86  | -3.128 to 6.842  | No  |
|                |       |     |       |                    |            | Row 22 | 0.71  | -4.271 to 5.700  | No  |
|                |       |     |       |                    |            | Row 23 | 0.86  | -4.128 to 5.842  | No  |
|                |       |     |       |                    |            | Row 24 | 1.14  | -3.842 to 6.128  | No  |
|                |       |     |       |                    |            | Row 25 | 0.14  | -4.842 to 5.128  | No  |
|                |       |     |       |                    |            | Row 26 | 0.57  | -4.414 to 5.557  | No  |
|                |       |     |       |                    |            | Row 27 | -0.86 | -5.842 to 4.128  | No  |
|                |       |     |       |                    |            | Row 28 | -1.57 | -6.557 to 3.414  | No  |
|                |       |     |       |                    |            | Row 29 | -1.71 | -6.700 to 3.271  | No  |
|                |       |     |       |                    |            | Row 30 | -2.14 | -7.128 to 2.842  | No  |
|                |       |     |       |                    |            | Row 31 | -1.86 | -6.842 to 3.128  | No  |
|                |       |     |       |                    |            | Row 32 | -2    | -6.985 to 2.985  | No  |
|                |       |     |       |                    |            | Row 33 | -1.14 | -6.128 to 3.842  | No  |
|                |       |     |       |                    |            | Row 34 | -0.43 | -5.414 to 4.557  | No  |
|                |       |     |       |                    |            | Row 35 | -0.29 | -5.271 to 4.700  | No  |
|                |       |     |       |                    |            | Row 36 | 0     | -4.985 to 4.985  | No  |

**F/I (rest)** Ventral: 18/ Dorsal: 22/ Animals: 33

| Source of Variation | % of total variation | P value  | P value summary | Significant? |
|---------------------|----------------------|----------|-----------------|--------------|
| Interaction         | 0.09101              | 0.7491   | ns              | No           |
| Current (pA)        | 66.86                | < 0.0001 | ****            | Yes          |
| Dorsal-Ventral      | 0.2584               | 0.544    | ns              | No           |
| Subjects (matching) | 26.19                | < 0.0001 | ****            | Yes          |

  

| ANOVA table         | SS    | DF  | MS    | F (DFn, DFd)        | P value    |
|---------------------|-------|-----|-------|---------------------|------------|
| Interaction         | 21.29 | 8   | 2.662 | F (8, 304) = 0.6339 | P = 0.7491 |
| Current (pA)        | 15643 | 8   | 1955  | F (8, 304) = 465.7  | P < 0.0001 |
| Dorsal-Ventral      | 60.47 | 1   | 60.47 | F (1, 38) = 0.3749  | P = 0.5440 |
| Subjects (matching) | 6128  | 38  | 161.3 | F (38, 304) = 38.41 | P < 0.0001 |
| Residual            | 1277  | 304 | 4.199 |                     |            |

| <b>F/I (-65)</b>                     |                      |          |                 |                     |            |
|--------------------------------------|----------------------|----------|-----------------|---------------------|------------|
| Ventral: 21/ Dorsal: 22/ Animals: 33 |                      |          |                 |                     |            |
| Source of Variation                  | % of total variation | P value  | P value summary | Significant?        |            |
| Interaction                          | 0.06572              | 0.772    | ns              | No                  |            |
| Current (pA)                         | 81.34                | < 0.0001 | ****            | Yes                 |            |
| Dorsal-Ventral                       | 0.3133               | 0.3404   | ns              | No                  |            |
| Subjects (matching)                  | 13.8                 | < 0.0001 | ****            | Yes                 |            |
| ANOVA table                          | SS                   | DF       | MS              | F (DFn, DFd)        | P value    |
| Interaction                          | 17.83                | 8        | 2.229           | F (8, 328) = 0.6069 | P = 0.7720 |
| Current (pA)                         | 22067                | 8        | 2758            | F (8, 328) = 751.1  | P < 0.0001 |
| Dorsal-Ventral                       | 84.98                | 1        | 84.98           | F (1, 41) = 0.9304  | P = 0.3404 |
| Subjects (matching)                  | 3745                 | 41       | 91.34           | F (41, 328) = 24.87 | P < 0.0001 |
| Residual                             | 1205                 | 328      | 3.672           |                     |            |

| <b>Resonance</b>                     |                      |          |                 |                      |            |
|--------------------------------------|----------------------|----------|-----------------|----------------------|------------|
| Ventral: 19/ Dorsal: 18/ Animals: 23 |                      |          |                 |                      |            |
| Source of Variation                  | % of total variation | P value  | P value summary | Significant?         |            |
| Interaction                          | 0.2162               | 0.4887   | ns              | No                   |            |
| Voltage (mV)                         | 67.14                | < 0.0001 | ****            | Yes                  |            |
| Dorsal-Ventral                       | 0.0008062            | 0.9718   | ns              | No                   |            |
| Subjects (matching)                  | 22.32                | < 0.0001 | ****            | Yes                  |            |
| ANOVA table                          | SS                   | DF       | MS              | F (DFn, DFd)         | P value    |
| Interaction                          | 0.3457               | 2        | 0.1728          | F (2, 70) = 0.7234   | P = 0.4887 |
| Voltage (mV)                         | 107.4                | 2        | 53.69           | F (2, 70) = 224.7    | P < 0.0001 |
| Dorsal-Ventral                       | 0.001289             | 1        | 0.001289        | F (1, 35) = 0.001264 | P = 0.9718 |
| Subjects (matching)                  | 35.7                 | 35       | 1.02            | F (35, 70) = 4.269   | P < 0.0001 |
| Residual                             | 16.73                | 70       | 0.2389          |                      |            |

| <b>Summation</b>                     |                      |          |                 |                    |            |
|--------------------------------------|----------------------|----------|-----------------|--------------------|------------|
| Ventral: 19/ Dorsal: 15/ Animals: 23 |                      |          |                 |                    |            |
| Source of Variation                  | % of total variation | P value  | P value summary | Significant?       |            |
| Interaction                          | 3.038                | 0.0103   | *               | Yes                |            |
| Voltage (mV)                         | 52.48                | < 0.0001 | ****            | Yes                |            |
| Dorsal-Ventral                       | 0.276                | 0.569    | ns              | No                 |            |
| Subjects (matching)                  | 26.68                | 0.0004   | ***             | Yes                |            |
| ANOVA table                          | SS                   | DF       | MS              | F (DFn, DFd)       | P value    |
| Interaction                          | 0.3036               | 2        | 0.1518          | F (2, 64) = 4.923  | P = 0.0103 |
| Voltage (mV)                         | 5.245                | 2        | 2.622           | F (2, 64) = 85.06  | P < 0.0001 |
| Dorsal-Ventral                       | 0.02759              | 1        | 0.02759         | F (1, 32) = 0.3311 | P = 0.5690 |
| Subjects (matching)                  | 2.666                | 32       | 0.08332         | F (32, 64) = 2.702 | P = 0.0004 |
| Residual                             | 1.973                | 64       | 0.03083         |                    |            |

| <b>Tau</b>                           |                      |         |                 |              |  |
|--------------------------------------|----------------------|---------|-----------------|--------------|--|
| Ventral: 19/ Dorsal: 18/ Animals: 23 |                      |         |                 |              |  |
| Source of Variation                  | % of total variation | P value | P value summary | Significant? |  |
|                                      |                      |         |                 |              |  |

|                     |        |          |       |                               |
|---------------------|--------|----------|-------|-------------------------------|
| Interaction         | 2.194  | 0.0227   | *     | Yes                           |
| Voltage (mV)        | 42.31  | < 0.0001 | ****  | Yes                           |
| Dorsal-Ventral      | 0.6834 | 0.421    | ns    | No                            |
| Subjects (matching) | 36.08  | < 0.0001 | ****  | Yes                           |
| ANOVA table         | SS     | DF       | MS    | F (DFn, DFd) P value          |
| Interaction         | 424.5  | 2        | 212.3 | F (2, 70) = 3.997 P = 0.0227  |
| Voltage (mV)        | 8187   | 2        | 4094  | F (2, 70) = 77.09 P < 0.0001  |
| Dorsal-Ventral      | 132.2  | 1        | 132.2 | F (1, 35) = 0.6630 P = 0.4210 |
| Subjects (matching) | 6981   | 35       | 199.5 | F (35, 70) = 3.756 P < 0.0001 |
| Residual            | 3717   | 70       | 53.1  |                               |

**Threshold** Ventral: 16/ Dorsal: 15/ Animals: 19

| Source of Variation | % of total variation | P value  | P value summary | Significant?                   | Bonferroni's multiple comparisons test | Mean Diff. | 95% CI of diff.   | Significant? | Summary |
|---------------------|----------------------|----------|-----------------|--------------------------------|----------------------------------------|------------|-------------------|--------------|---------|
| Interaction         | 0.2057               | 0.6979   | ns              | No                             | Dorsal - Ventral                       |            |                   |              |         |
| Step duration (ms)  | 3.1                  | < 0.0001 | ****            | Yes                            | Row 1                                  | -5.642     | -10.09 to -1.192  | Yes          | **      |
| Dorsal-Ventral      | 31.61                | 0.0003   | ***             | Yes                            | Row 2                                  | -6.197     | -10.65 to -1.747  | Yes          | **      |
| Subjects (matching) | 55.76                | < 0.0001 | ****            | Yes                            | Row 3                                  | -7.018     | -11.47 to -2.568  | Yes          | ***     |
| ANOVA table         | SS                   | DF       | MS              | F (DFn, DFd) P value           | Row 4                                  | -6.565     | -11.01 to -2.114  | Yes          | ***     |
| Interaction (ms)    | 13.32                | 6        | 2.22            | F (6, 174) = 0.6402 P = 0.6979 | Row 5                                  | -6.058     | -10.51 to -1.607  | Yes          | **      |
| Step duration       | 200.7                | 6        | 33.46           | F (6, 174) = 9.650 P < 0.0001  | Row 6                                  | -6.118     | -10.57 to -1.668  | Yes          | **      |
| Dorsal-Ventral      | 2047                 | 1        | 2047            | F (1, 29) = 16.44 P = 0.0003   | Row 7                                  | -5.426     | -9.876 to -0.9755 | Yes          | **      |
| Subjects (matching) | 3611                 | 29       | 124.5           | F (29, 174) = 35.91 P < 0.0001 |                                        |            |                   |              |         |
| Residual            | 603.3                | 174      | 3.467           |                                |                                        |            |                   |              |         |

**AP Amplitude** Ventral: 14/ Dorsal: 13/ Animals: 16

| Source of Variation | % of total variation | P value  | P value summary | Significant?                   |
|---------------------|----------------------|----------|-----------------|--------------------------------|
| Interaction         | 0.5348               | 0.1303   | ns              | No                             |
| step duration (ms)  | 4.021                | < 0.0001 | ****            | Yes                            |
| Dorsal-Ventral      | 0.2185               | 0.8046   | ns              | No                             |
| Subjects (matching) | 87.35                | < 0.0001 | ****            | Yes                            |
| ANOVA table         | SS                   | DF       | MS              | F (DFn, DFd) P value           |
| Interaction         | 105.7                | 6        | 17.61           | F (6, 150) = 1.677 P = 0.1303  |
| step duration (ms)  | 794.5                | 6        | 132.4           | F (6, 150) = 12.61 P < 0.0001  |
| Dorsal-Ventral      | 43.16                | 1        | 43.16           | F (1, 25) = 0.06252 P = 0.8046 |
| Subjects (matching) | 17257                | 25       | 690.3           | F (25, 150) = 65.74 P < 0.0001 |
| Residual            | 1575                 | 150      | 10.5            |                                |

**AP Width** Ventral: 14/ Dorsal: 13/ Animals: 16

| Source of Variation | % of total variation | P value  | P value summary | Significant? |
|---------------------|----------------------|----------|-----------------|--------------|
| Interaction         | 1.259                | < 0.0001 | ****            | Yes          |

|                     |        |          |          |                     |            |
|---------------------|--------|----------|----------|---------------------|------------|
| step duration (ms)  | 15.84  | < 0.0001 | ****     | Yes                 |            |
| Dorsal-Ventral      | 1.56   | 0.4783   | ns       | No                  |            |
| Subjects (matching) | 75.27  | < 0.0001 | ****     | Yes                 |            |
| ANOVA table         | SS     | DF       | MS       | F (DFn, DFd)        | P value    |
| Interaction         | 0.1037 | 6        | 0.01728  | F (6, 150) = 5.463  | P < 0.0001 |
| step duration (ms)  | 1.304  | 6        | 0.2173   | F (6, 150) = 68.70  | P < 0.0001 |
| Dorsal-Ventral      | 0.1284 | 1        | 0.1284   | F (1, 25) = 0.5182  | P = 0.4783 |
| Subjects (matching) | 6.196  | 25       | 0.2478   | F (25, 150) = 78.35 | P < 0.0001 |
| Residual            | 0.4745 | 150      | 0.003163 |                     |            |

**dV/dt** Ventral: 14/ Dorsal: 13/ Animals: 16

|                     |                      |          |                 |                     |            |
|---------------------|----------------------|----------|-----------------|---------------------|------------|
| Source of Variation | % of total variation | P value  | P value summary | Significant?        |            |
| Interaction         | 0.1074               | 0.3398   | ns              | No                  |            |
| step duration (ms)  | 1.349                | < 0.0001 | ****            | Yes                 |            |
| Dorsal-Ventral      | 0.8095               | 0.649    | ns              | No                  |            |
| Subjects (matching) | 95.36                | < 0.0001 | ****            | Yes                 |            |
| ANOVA table         | SS                   | DF       | MS              | F (DFn, DFd)        | P value    |
| Interaction         | 857.3                | 6        | 142.9           | F (6, 150) = 1.144  | P = 0.3398 |
| step duration (ms)  | 10765                | 6        | 1794            | F (6, 150) = 14.36  | P < 0.0001 |
| Dorsal-Ventral      | 6460                 | 1        | 6460            | F (1, 25) = 0.2122  | P = 0.6490 |
| Subjects (matching) | 760983               | 25       | 30439           | F (25, 150) = 243.7 | P < 0.0001 |
| Residual            | 18738                | 150      | 124.9           |                     |            |

**Ventral Threshold** Ventral: 10/ Animals: 9

|                     |                      |          |                 |                    |            |  |  |  |
|---------------------|----------------------|----------|-----------------|--------------------|------------|--|--|--|
| Source of Variation | % of total variation | P value  | P value summary | Significant?       |            |  |  |  |
| Interaction         | 3.218                | 0.3974   | ns              | No                 |            |  |  |  |
| Step duration (ms)  | 14.14                | 0.0012   | **              | Yes                |            |  |  |  |
| 4-AP                | 15.85                | < 0.0001 | ****            | Yes                |            |  |  |  |
| Subjects (matching) | 34.85                | 0.3656   | ns              | No                 |            |  |  |  |
| ANOVA table         | SS                   | DF       | MS              | F (DFn, DFd)       | P value    |  |  |  |
| Interaction         | 68.78                | 6        | 11.46           | F (6, 63) = 1.058  | P = 0.3974 |  |  |  |
| Step duration (ms)  | 302.2                | 6        | 50.37           | F (6, 63) = 4.260  | P = 0.0012 |  |  |  |
| 4-AP                | 338.8                | 1        | 338.8           | F (1, 63) = 31.26  | P < 0.0001 |  |  |  |
| Subjects (matching) | 744.8                | 63       | 11.82           | F (63, 63) = 1.091 | P = 0.3656 |  |  |  |
| Residual            | 682.8                | 63       | 10.84           |                    |            |  |  |  |

**Dorsal Threshold** Dorsal: 7/ Animals: 9

|                     |                      |         |                 |              |  |  |  |  |
|---------------------|----------------------|---------|-----------------|--------------|--|--|--|--|
| Source of Variation | % of total variation | P value | P value summary | Significant? |  |  |  |  |
| Interaction         | 1.289                | 0.1231  | ns              | No           |  |  |  |  |
| Step duration (ms)  | 24.88                | 0.0307  | *               | Yes          |  |  |  |  |

| Sidak's multiple comparisons test | Mean Diff. | 95% CI of diff.  | Significant? | Summary |
|-----------------------------------|------------|------------------|--------------|---------|
| <b>Ventral - Ventral (4AP)</b>    |            |                  |              |         |
| Row 1                             | 0.535      | -3.547 to 4.617  | No           | ns      |
| Row 2                             | 1.735      | -2.347 to 5.817  | No           | ns      |
| Row 3                             | 3.067      | -1.015 to 7.149  | No           | ns      |
| Row 4                             | 3.399      | -0.6837 to 7.481 | No           | ns      |
| Row 5                             | 3.769      | -0.3129 to 7.852 | No           | ns      |
| Row 6                             | 4.794      | 0.7118 to 8.876  | Yes          | *       |
| Row 7                             | 4.481      | 0.3986 to 8.563  | Yes          | *       |
| <b>Dorsal - Dorsal (4AP)</b>      |            |                  |              |         |
| Row 1                             | -0.5381    | -2.241 to 1.164  | No           | ns      |

|                           |                                    |          |                 |                     |                                   |            |                   |                    |         |     |
|---------------------------|------------------------------------|----------|-----------------|---------------------|-----------------------------------|------------|-------------------|--------------------|---------|-----|
| 4-AP                      | 2.019                              | 0.0002   | ***             | Yes                 | Row 2                             | 0.5322     | -1.170 to 2.235   | No                 | ns      |     |
| Subjects (matching)       | 66.79                              | < 0.0001 | ****            | Yes                 | Row 3                             | 0.7181     | -0.9845 to 2.421  | No                 | ns      |     |
| ANOVA table               | SS                                 | DF       | MS              | F (DFn, DFd)        | P value                           | Row 4      | 1.002             | -0.7004 to 2.705   | No      | ns  |
| Interaction               | 13.76                              | 6        | 2.293           | F (6, 42) = 1.797   | P = 0.1231                        | Row 5      | 1.539             | -0.1631 to 3.242   | No      | ns  |
| Step duration (ms)        | 265.5                              | 6        | 44.25           | F (6, 42) = 2.607   | P = 0.0307                        | Row 6      | 1.389             | -0.3132 to 3.092   | No      | ns  |
| 4-AP                      | 21.55                              | 1        | 21.55           | F (1, 42) = 16.89   | P = 0.0002                        | Row 7      | 1.922             | 0.2198 to 3.625    | Yes     | *   |
| Subjects (matching)       | 712.9                              | 42       | 16.97           | F (42, 42) = 13.30  | P < 0.0001                        |            |                   |                    |         |     |
| Residual                  | 53.58                              | 42       | 1.276           |                     |                                   |            |                   |                    |         |     |
| <b>Threshold 4-AP</b>     | Ventral: 10/ Dorsal: 7/ Animals: 9 |          |                 |                     |                                   |            |                   |                    |         |     |
| Source of Variation       | % of total variation               | P value  | P value summary | Significant?        |                                   |            |                   |                    |         |     |
| Interaction               | 1.746                              | 0.9102   | ns              | No                  |                                   |            |                   |                    |         |     |
| Step duration (ms)        | 10.56                              | 0.0594   | ns              | No                  |                                   |            |                   |                    |         |     |
| Dorsal-Ventral            | 0.1612                             | 0.662    | ns              | No                  |                                   |            |                   |                    |         |     |
| ANOVA table               | SS                                 | DF       | MS              | F (DFn, DFd)        | P value                           |            |                   |                    |         |     |
| Interaction               | 19.4                               | 6        | 3.233           | F (6, 105) = 0.3471 | P = 0.9102                        |            |                   |                    |         |     |
| Step duration (ms)        | 117.3                              | 6        | 19.55           | F (6, 105) = 2.099  | P = 0.0594                        |            |                   |                    |         |     |
| Dorsal-Ventral            | 1.79                               | 1        | 1.79            | F (1, 105) = 0.1922 | P = 0.6620                        |            |                   |                    |         |     |
| Residual                  | 978.1                              | 105      | 9.315           |                     |                                   |            |                   |                    |         |     |
| <b>Ventral F/I (4-AP)</b> | Ventral: 9/ Animals: 9             |          |                 |                     |                                   |            |                   |                    |         |     |
| Source of Variation       | % of total variation               | P value  | P value summary | Significant?        | Sidak's multiple comparisons test | Mean Diff. | 95% CI of diff.   | Significant?       | Summary |     |
| Interaction               | 0.1509                             | 0.3213   | ns              | No                  | Ventral - Ventral 4AP             |            |                   |                    |         |     |
| Current (pA)              | 56.62                              | < 0.0001 | ****            | Yes                 | Row 1                             | -3         | -5.182 to -0.8181 | Yes                | **      |     |
| 4AP                       | 2.26                               | < 0.0001 | ****            | Yes                 | Row 2                             | -4.556     | -6.737 to -2.374  | Yes                | ****    |     |
| Subjects (matching)       | 39.81                              | < 0.0001 | ****            | Yes                 | Row 3                             | -3.889     | -6.071 to -1.707  | Yes                | ****    |     |
| ANOVA table               | SS                                 | DF       | MS              | F (DFn, DFd)        | P value                           | Row 4      | -3.444            | -5.626 to -1.263   | Yes     | *** |
| Interaction               | 22.44                              | 7        | 3.206           | F (7, 64) = 1.190   | P = 0.3213                        | Row 5      | -2.667            | -4.849 to -0.4848  | Yes     | **  |
| Current (pA)              | 8419                               | 7        | 1203            | F (7, 64) = 13.00   | P < 0.0001                        | Row 6      | -2.333            | -4.515 to -0.1514  | Yes     | *   |
| 4AP                       | 336.1                              | 1        | 336.1           | F (1, 64) = 124.7   | P < 0.0001                        | Row 7      | -2.333            | -4.515 to -0.1514  | Yes     | *   |
| Subjects (matching)       | 5920                               | 64       | 92.49           | F (64, 64) = 34.33  | P < 0.0001                        | Row 8      | -2.222            | -4.404 to -0.04033 | Yes     | *   |
| Residual                  | 172.4                              | 64       | 2.694           |                     |                                   |            |                   |                    |         |     |
| <b>Dorsal F/I (4-AP)</b>  | Dorsal: 8/ Animals: 9              |          |                 |                     |                                   |            |                   |                    |         |     |
| Source of Variation       | % of total variation               | P value  | P value summary | Significant?        | Sidak's multiple comparisons test | Mean Diff. | 95% CI of diff.   | Significant?       | Summary |     |
| Interaction               | 0.1895                             | 0.7098   | ns              | No                  | Dorsal - Dorsal 4AP               |            |                   |                    |         |     |
| Current (pA)              | 78.61                              | < 0.0001 | ****            | Yes                 | Row 1                             | -1.625     | -4.848 to 1.598   | No                 | ns      |     |
| 4-AP                      | 1.04                               | < 0.0001 | ****            | Yes                 | Row 2                             | -3.375     | -6.598 to -0.1521 | Yes                | *       |     |
| Subjects (matching)       | 17.84                              | < 0.0001 | ****            | Yes                 | Row 3                             | -1.875     | -5.098 to 1.348   | No                 | ns      |     |

| ANOVA table         | SS    | DF | MS    | F (DFn, DFd)          | P value    | Row 4 | -0.125 | -3.348 to<br>3.098  | No | ns |
|---------------------|-------|----|-------|-----------------------|------------|-------|--------|---------------------|----|----|
| Interaction         | 23.68 | 7  | 3.383 | F (7, 56) =<br>0.6537 | P = 0.7098 | Row 5 | -2.25  | -5.473 to<br>0.9729 | No | ns |
| Current (pA)        | 9822  | 7  | 1403  | F (7, 56) =<br>35.25  | P < 0.0001 | Row 6 | -2.375 | -5.598 to<br>0.8479 | No | ns |
| 4-AP                | 130   | 1  | 130   | F (1, 56) =<br>25.12  | P < 0.0001 | Row 7 | -2.375 | -5.598 to<br>0.8479 | No | ns |
| Subjects (matching) | 2229  | 56 | 39.81 | F (56, 56) =<br>7.692 | P < 0.0001 | Row 8 | -2.125 | -5.348 to<br>1.098  | No | ns |
| Residual            | 289.8 | 56 | 5.175 |                       |            |       |        |                     |    |    |
